# Supplementary material
Source: Springer Nature journal article supplement (https://www.springermedizin.de/resource/supplementary/13075_2012_3638_MOESM3_ESM.pdf/9694974)

# % Inhibition Curve

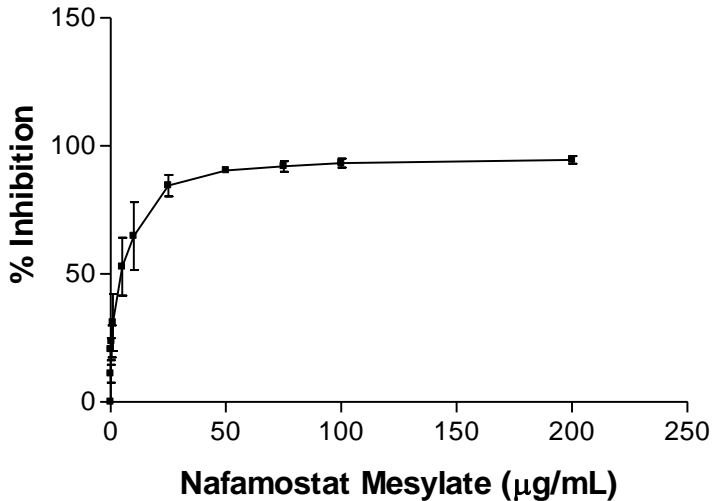

Supplement: MOESM3 [file 9694974]
